# Supplementary material
Source: publisher figshare collection journal article supplement (https://karger.figshare.com/ndownloader/files/14522756)
Supplement: Supplementary file 1 [file 14522756]

**SUPPLEMENTAL INFORMATION**

Questions asked during Research Coordinator Interviews

1. What is your experience coordinating other neonatal research studies (years of experience, roles on projects, etc.)?
2. What is the structure of your inpatient research team (number of people on team, roles, work hours, flexibility of work hours)?
3. Do you think your patients perceive you as one whole research team or as individuals?
4. Do you think they perceive the research team as one with the NICU team or as separate?
5. Where is your office located relative to the NICU (wherever the patients are located) and how often are the research team in the unit/at patient bedsides?
6. Are you providing incentives to PROP participants? If so, how much? When do you discuss this and do you think it motivates families to participate?
7. Who conducts neonatal follow-up with study patients? Which coordinators arrange study follow-up? Is PROP follow-up the same as clinical follow-up or separate?
8. Where are your clinics located relative to the unit?
9. What are your current plans and strategies to prevent attrition in PROP?
10. What makes research at your center work/successful? Anything about PROP that makes it harder than other studies?
